# Supplementary material
Source: Springer Nature journal article supplement (https://www.springermedizin.de/resource/supplementary/12885_2013_4675_MOESM6_ESM.pdf/9466952)
Supplement: MOESM6 [file 9466952]

Additional file 6: Table S1. Summary of included/excluded studies in a priori sensitivity analyses.

| Author (year)       | Experimental Treatment                 | Included in sensitivity analysis (Y/N): |                             |                          |                            |
|---------------------|----------------------------------------|-----------------------------------------|-----------------------------|--------------------------|----------------------------|
|                     |                                        | Year of publication >2007               | Number of patients/arm >100 | Proportion Stage IV >75% | Proportion ECOG 0-1** <85% |
| Bramhall (2002)     | Gemcitabine +Marismastat               | N                                       | Y                           | N                        | N                          |
| Berlin (2002)       | Gemcitabine+5FU                        | N                                       | Y                           | N                        | Y                          |
| VanCustem (2004)    | Gemcitabine +Tipifarnib                | N                                       | Y                           | Y                        | Y                          |
| Rocha Lima (2004)   | Gemcitabine+ Irinotecan                | N                                       | Y                           | Y                        | Y                          |
| Louvet (2005)       | Gemcitabine +Exatecan                  | N                                       | N                           | N                        | Y                          |
| Reni (2005)         | Gemcitabine + Oxaliplatin              | N                                       | N                           | N                        | N                          |
| Riess (2005)        | Gemcitabine +epirubicin +cisplatin+5FU | N                                       | Y                           | Y                        | Y                          |
| Oettle (2005)       | Gem+ Capecitabine                      | N                                       | Y                           | Y                        | N                          |
| Abou-Alfa (2006)    | Gem+Pemetrexed                         | N                                       | Y                           | Y                        | Y                          |
| Heinemann (2006)    | Gemcitabine +Cisplatin                 | N                                       | N                           | Y                        | N                          |
| Stathopoulos (2006) | Gemcitabine +Irinotecan                | N                                       | N                           | N                        | N                          |
| Poplin (2006)       | Gemcitabine + Oxaliplatin              | N                                       | Y                           | Y                        | Y                          |
| Herrmann (2007)     | Gemcitabine+5FU                        | N                                       | Y                           | Y                        | Y                          |

|                   |                             | +folinic acid |   |   |   |
|-------------------|-----------------------------|---------------|---|---|---|
| Moore (2007)      | Gemcitabine +Erlotinib      | N             | Y | Y | Y |
| Cunningham (2009) | Gem + Capecitabine          | Y             | Y | N | Y |
| VanCustem (2009)  | Gem+Erlotinib+ Bevacizumab* | Y             | Y | Y | Y |
| Philip (2010)     | Gemcitabine + Cetuximab     | Y             | Y | Y | Y |
| Colucci (2010)    | Gem+Cisplatin               | Y             | Y | Y | Y |
| Kindler (2011)    | Gem+Axinitib                | Y             | Y | N | N |
| Conroy (2011)     | FOLFIRINOX                  | Y             | Y | Y | N |
| Goncalves (2012)  | Gem+Sorafenib               | Y             | N | N | N |
| Heinemann (2012)  | Capecitabine+ Erlotinib*    | Y             | Y | Y | Y |
| Von Hoff (2013)   | Gem+ NAB-P                  | Y             | Y | Y | Y |

All experimental treatments in table were compared to gemcitabine alone. \*Comparator gemcitabine+erlotinib. \*\*If KPS was reported en lieu of ECOG performance status, the equivalent value (KPS >80%) was used instead.
